# Supplementary material for: Modulation of perovskite-related frameworks induced by alkaline earth metals in phosphate fluorides A2MPO4F (A = K, Rb; M = Ba, Ca)
Source: Royal Society of Chemistry journal article supplement (doi:10.1039/c9nj01051c), 2019-01-01
Supplement: c9nj01051c1.pdf [file c9nj01051c1.pdf]

# *New Journal of Chemistry*

## **Electronic Supplementary Information for:**

### **Modulation of Perovskite-Related Framework Induced by Alkaline Earth Metal in Phosphate Fluorides $A_2MPO_4F$ (A= K, Rb; M = Ba, Ca)**

Kun Chai, <sup>a</sup> Shichao Cheng, <sup>b</sup> Hongyi Li <sup>\*c</sup> and Bin Dai <sup>\*a</sup>

<sup>a</sup>Key Laboratory for Green Processing of Chemical Engineering of Xinjiang Bingtuan,  
School of Chemistry and Chemical Engineering, Shihezi University,  
Shihezi 832003, China;

<sup>b</sup>School of Physical Science and Technology, Xinjiang University,  
666 Shengli Road, Urumqi 830046, China;

<sup>c</sup>Quality of Products Supervision & Inspection Institute of Technology,  
Xinjiang Uygur Autonomous, 830011, China.

\*Corresponding authors,

E-mail: lihy@ms.xjb.ac.cn (Hongyi Li); db\_tea@shzu.edu.cn (Bin Dai).

Phone: (+86)993-2057270, Fax: (+86)993-2057210.

**Table S1.** Crystal data and structure refinement for K<sub>2</sub>CaPO<sub>4</sub>F.

|                                                                                                                      |                                                                            |
|----------------------------------------------------------------------------------------------------------------------|----------------------------------------------------------------------------|
| Empirical formula                                                                                                    | K <sub>2</sub> CaPO <sub>4</sub> F                                         |
| Formula weight                                                                                                       | 232.25                                                                     |
| Temperature                                                                                                          | 273(2) K                                                                   |
| Wavelength                                                                                                           | 0.71073 Å                                                                  |
| Crystal system                                                                                                       | Orthorhombic                                                               |
| Space group, <i>Z</i>                                                                                                | <i>Pnma</i> , 4                                                            |
| Unit cell dimensions                                                                                                 | <i>a</i> = 12.661(3) Å<br><i>b</i> = 5.8589(16) Å<br><i>c</i> = 7.325(2) Å |
| Volume                                                                                                               | 543.4(2) Å <sup>3</sup>                                                    |
| Calculated density                                                                                                   | 2.839 g/cm <sup>3</sup>                                                    |
| Absorption coefficient                                                                                               | 2.931 mm <sup>-1</sup>                                                     |
| <i>F</i> (000)                                                                                                       | 456                                                                        |
| Limiting indices                                                                                                     | -16 ≤ <i>h</i> ≤ 16, -7 ≤ <i>k</i> ≤ 17, -9 ≤ <i>l</i> ≤ 5                 |
| Reflections collected / unique                                                                                       | 2849 / 695 [ <i>R</i> (int) = 0.0434]                                      |
| Completeness                                                                                                         | 99.4 %                                                                     |
| Data / restraints / parameters                                                                                       | 695 / 0 / 53                                                               |
| Goodness-of-fit on <i>F</i> <sub>o</sub> <sup>2</sup>                                                                | 1.247                                                                      |
| Final <i>R</i> indices [ <i>F</i> <sub>o</sub> <sup>2</sup> > 2σ( <i>F</i> <sub>o</sub> <sup>2</sup> )] <sup>a</sup> | <i>R</i> <sub>1</sub> = 0.0727, <i>wR</i> <sub>2</sub> = 0.1725            |
| <i>R</i> indices (all data) <sup>a</sup>                                                                             | <i>R</i> <sub>1</sub> = 0.0751, <i>wR</i> <sub>2</sub> = 0.1735            |
| Largest diff. peak and hole                                                                                          | 1.095 and -0.941 e·Å <sup>-3</sup>                                         |

$$^a R_1 = \sum ||F_o| - |F_c|| / \sum |F_o| \text{ and } wR_2 = [\sum w(F_o^2 - F_c^2)^2 / \sum wF_o^4]^{1/2} \text{ for } F_o^2 > 2\sigma(F_o^2).$$

**Table S2.** Atomic coordinates ( $\times 10^4$ ), equivalent isotropic displacement parameters ( $\text{\AA}^2 \times 10^3$ ) and BVS for  $\text{Rb}_2\text{CaPO}_4\text{F}$ .  $U_{(\text{eq})}$  is defined as one third of the trace of the orthogonalized  $U_{ij}$  tensor.

|       | x       | y      | z        | U(eq) | BVS  |
|-------|---------|--------|----------|-------|------|
| Rb(1) | 763(1)  | 2500   | 7015(1)  | 15(1) | 1.16 |
| Rb(2) | 3120(1) | 2500   | 4895(1)  | 15(1) | 1.25 |
| Ca(1) | 738(1)  | 2500   | 2002(1)  | 8(1)  | 2.12 |
| P(1)  | 3414(1) | 2500   | 9836(2)  | 7(1)  | 5.00 |
| O(1)  | 3649(2) | 403(3) | 8712(3)  | 15(1) | 2.11 |
| O(2)  | 4112(2) | 2500   | 11513(5) | 16(1) | 2.11 |
| O(3)  | 2268(2) | 2500   | 10371(4) | 15(1) | 2.1  |
| F(1)  | 0       | 0      | 0        | 13(1) | 0.90 |

**Table S3.** Atomic coordinates ( $\times 10^4$ ), equivalent isotropic displacement parameters ( $\text{\AA}^2 \times 10^3$ ) and BVS for  $\text{K}_2\text{CaPO}_4\text{F}$ .  $U_{(\text{eq})}$  is defined as one third of the trace of the orthogonalized  $U_{ij}$  tensor.

|       | x       | y        | z        | U(eq) | BVS  |
|-------|---------|----------|----------|-------|------|
| K(1)  | 6876(2) | 7500     | 9961(4)  | 24(1) | 0.97 |
| K(2)  | 5740(2) | 2500     | -2910(4) | 21(1) | 0.96 |
| Ca(1) | 5710(2) | 2500     | 2022(3)  | 10(1) | 2.31 |
| P(1)  | 6614(2) | 7500     | 4882(3)  | 7(1)  | 5.10 |
| O(1)  | 5985(7) | 7500     | 6647(13) | 26(2) | 2.09 |
| O(2)  | 6323(5) | 5360(10) | 3799(9)  | 26(2) | 2.08 |
| O(3)  | 7804(6) | 7500     | 5254(14) | 26(2) | 2.00 |
| F(1)  | 5000    | 0        | 0        | 16(1) | 1.12 |

**Table S4.** Selected bond distances (Å) and bond angles (deg) for Rb<sub>2</sub>CaPO<sub>4</sub>F.

|               |            |                     |            |
|---------------|------------|---------------------|------------|
| Rb(1)-F(1)#1  | 2.8498(15) | F(1)#1-Rb(1)-F(1)#2 | 63.16(5)   |
| Rb(1)-F(1)#2  | 2.8498(15) | F(1)#1-Rb(1)-O(2)#3 | 129.34(7)  |
| Rb(1)-O(3)#3  | 3.013(2)   | F(1)#2-Rb(1)-O(2)#3 | 66.17(7)   |
| Rb(1)-O(3)#4  | 3.013(2)   | F(1)#1-Rb(1)-O(2)#4 | 66.17(7)   |
| Rb(1)-O(2)#5  | 3.048(3)   | F(1)#2-Rb(1)-O(2)#4 | 129.34(7)  |
| Rb(1)-O(2)#6  | 3.048(3)   | O(2)#3-Rb(1)-O(2)#4 | 164.49(13) |
| Rb(1)-O(2)#3  | 3.100(3)   | F(1)#1-Rb(1)-O(1)#5 | 92.57(6)   |
| Rb(1)-O(2)#7  | 3.100(3)   | F(1)#2-Rb(1)-O(1)#5 | 67.33(5)   |
| Rb(1)-O(4)    | 3.162(4)   | O(2)#3-Rb(1)-O(1)#5 | 67.60(8)   |
| Rb(1)-O(3)#5  | 3.378(4)   | O(2)#4-Rb(1)-O(1)#5 | 115.65(7)  |
| Rb(2)-O(3)#8  | 2.821(4)   | F(1)#1-Rb(1)-O(1)#6 | 67.33(5)   |
| Rb(2)-F(1)#9  | 2.8475(16) | F(1)#2-Rb(1)-O(1)#6 | 92.57(6)   |
| Rb(2)-F(1)#10 | 2.8475(16) | O(2)#3-Rb(1)-O(1)#6 | 115.65(7)  |
| Rb(2)-O(2)#3  | 2.997(3)   | O(2)#4-Rb(1)-O(1)#6 | 67.60(8)   |
| Rb(2)-O(2)#7  | 2.997(3)   | O(1)#5-Rb(1)-O(1)#6 | 48.51(9)   |
| Rb(2)-O(4)#3  | 3.047(2)   | F(1)#1-Rb(1)-O(1)#3 | 173.86(4)  |
| Rb(2)-O(4)#4  | 3.047(2)   | F(1)#2-Rb(1)-O(1)#3 | 114.12(6)  |
| Rb(2)-O(2)#11 | 3.177(3)   | O(2)#3-Rb(1)-O(1)#3 | 48.30(8)   |
| Rb(2)-O(2)    | 3.177(3)   | O(2)#4-Rb(1)-O(1)#3 | 116.28(8)  |
| Rb(2)-O(4)#8  | 3.539(4)   | O(1)#5-Rb(1)-O(1)#3 | 81.29(7)   |
| Ca(1)-O(1)#7  | 2.290(2)   | O(1)#6-Rb(1)-O(1)#3 | 107.94(5)  |
| Ca(1)-O(1)#3  | 2.290(2)   | F(1)#1-Rb(1)-O(1)#7 | 114.12(6)  |
| Ca(1)-F(1)    | 2.3131(12) | F(1)#2-Rb(1)-O(1)#7 | 173.86(4)  |
| Ca(1)-F(1)#14 | 2.3131(12) | O(2)#3-Rb(1)-O(1)#7 | 116.28(8)  |
| Ca(1)-O(3)#8  | 2.315(3)   | O(2)#4-Rb(1)-O(1)#7 | 48.30(8)   |
| Ca(1)-O(2)#5  | 2.370(3)   | O(1)#5-Rb(1)-O(1)#7 | 107.94(5)  |
| P(1)-O(3)     | 1.531(3)   | O(1)#6-Rb(1)-O(1)#7 | 81.29(7)   |
| P(1)-O(1)#11  | 1.535(2)   | O(1)#3-Rb(1)-O(1)#7 | 81.29(7)   |
| P(1)-O(1)     | 1.535(2)   | O(1)#3-Rb(1)-O(1)#7 | 67.98(9)   |

---

|           |          |                   |          |
|-----------|----------|-------------------|----------|
| P(1)-O(2) | 1.538(3) | F(1)#1-Rb(1)-O(3) | 66.23(6) |
|-----------|----------|-------------------|----------|

---

Symmetry transformations used to generate equivalent atoms:

#1  $-x, y+1/2, -z+1$    #2  $x, y, z+1$    #3  $-x+1/2, -y, z-1/2$    #4  $-x+1/2, -y+1, z-1/2$   
#5  $x-1/2, y, -z+3/2$    #6  $x-1/2, -y+1/2, -z+3/2$    #7  $-x+1/2, y+1/2, z-1/2$    #8  $x, y, z-1$   
#9  $x+1/2, -y+1/2, -z+1/2$    #10  $-x+1/2, -y, z+1/2$    #11  $x, -y+1/2, z$   
#12  $x+1/2, y, -z+3/2$    #13  $-x+1/2, -y+1, z+1/2$    #14  $-x, y+1/2, -z$    #15  $-x, -y, -z+1$   
#16  $-x, -y+1, -z+1$    #17  $x-1/2, y, -z+1/2$    #18  $-x, -y, -z$

**Table S5.** Selected bond distances (Å) and bond angles (deg) for K<sub>2</sub>CaPO<sub>4</sub>F.

|              |            |                      |            |
|--------------|------------|----------------------|------------|
| K(1)-O(1)    | 2.677(10)  | O(2)-Ca(1)-O(2)#1    | 95.7(3)    |
| K(1)-F(1)#9  | 2.791(2)   | O(2)-Ca(1)-F(1)      | 172.35(18) |
| K(1)-F(1)#10 | 2.791(2)   | O(2)#1-Ca(1)-F(1)    | 91.91(17)  |
| K(1)-O(2)#11 | 2.955(7)   | O(2)-Ca(1)-F(1)#2    | 91.91(17)  |
| K(1)-O(2)#12 | 2.955(7)   | O(2)#1-Ca(1)-F(1)#2  | 172.35(18) |
| K(1)-O(3)#13 | 2.9651(17) | F(1)-Ca(1)-F(1)#2    | 80.44(7)   |
| K(1)-O(3)#12 | 2.9651(16) | O(2)-Ca(1)-O(3)#3    | 92.5(2)    |
| K(1)-O(2)#14 | 3.157(7)   | O(2)#1-Ca(1)-O(3)#3  | 92.5(2)    |
| K(1)-O(2)#15 | 3.157(7)   | F(1)-Ca(1)-O(3)#3    | 87.5(2)    |
| K(2)-F(1)#2  | 2.751(2)   | F(1)#2-Ca(1)-O(3)#3  | 87.5(2)    |
| K(2)-F(1)    | 2.751(2)   | O(2)-Ca(1)-O(1)#4    | 94.3(2)    |
| K(2)-O(3)#3  | 2.961(10)  | O(2)#1-Ca(1)-O(1)#4  | 94.3(2)    |
| K(2)-O(1)#7  | 2.9636(15) | F(1)-Ca(1)-O(1)#4    | 84.8(2)    |
| K(2)-O(1)#8  | 2.9636(15) | F(1)#2-Ca(1)-O(1)#4  | 84.8(2)    |
| K(2)-O(2)#17 | 2.969(7)   | O(3)#3-Ca(1)-O(1)#4  | 169.9(4)   |
| K(2)-O(2)#6  | 2.969(7)   | O(1)-K(1)-F(1)#9     | 69.54(16)  |
| K(2)-O(2)#18 | 3.027(7)   | O(1)-K(1)-F(1)#10    | 69.54(16)  |
| K(2)-O(2)#7  | 3.027(7)   | F(1)#9-K(1)-F(1)#10  | 63.32(6)   |
| Ca(1)-O(2)   | 2.260(6)   | O(1)-K(1)-O(2)#11    | 93.7(2)    |
| Ca(1)-O(2)#1 | 2.260(6)   | F(1)#9-K(1)-O(2)#11  | 163.21(17) |
| Ca(1)-F(1)   | 2.2683(16) | F(1)#10-K(1)-O(2)#11 | 111.23(12) |
| Ca(1)-F(1)#2 | 2.2683(16) | O(1)-K(1)-O(2)#12    | 93.7(2)    |
| Ca(1)-O(3)#3 | 2.284(8)   | F(1)#9-K(1)-O(2)#12  | 111.23(12) |
| Ca(1)-O(1)#4 | 2.357(9)   | F(1)#10-K(1)-O(2)#12 | 163.21(17) |

Symmetry transformations used to generate equivalent atoms:

#1  $x+1/2, -y+3/2, -z+1/2$     #2  $-x+1/2, -y+1, z+1/2$     #3  $-x+1/2, -y, z-1/2$   
#4  $-x+1/2, -y+1, z-1/2$     #5  $x+1/2, -y+1/2, -z+1/2$     #6  $x+1/2, y, -z+1/2$

#7  $-x+1/2, y+1/2, z-1/2$     #8  $-x+1/2, -y+2, z+1/2$     #9  $x, -y+1/2, z$     #10  $x, y+1, z$   
#11  $-x+1/2, y+1/2, z+1/2$     #12  $-x, y-1/2, -z$     #13  $-x, -y+1, -z+1$     #14  $x-1/2, y, -z+1/2$   
#15  $x-1/2, y+1, -z+1/2$     #16  $-x+1/2, -y+2, z-1/2$     #17  $x, y-1, z$   
#18  $-x+1/2, -y, z+1/2$     #19  $-x, -y+2, -z$



**Table S6.** Comparison of BVS and GII values in  $\text{Rb}_2\text{CaPO}_4\text{F}$  and  $\text{K}_2\text{BaPO}_4\text{F}$ .

| Compounds                          | BVS           |              |                  |                  | GII                          |                                |
|------------------------------------|---------------|--------------|------------------|------------------|------------------------------|--------------------------------|
|                                    | $\text{Rb}^+$ | $\text{K}^+$ | $\text{Ca}^{2+}$ | $\text{Ba}^{2+}$ | $\text{Rb}^+ \& \text{Ca}^+$ | $\text{K}^+ \& \text{Ba}^{2+}$ |
| $\text{Rb}_2\text{CaPO}_4\text{F}$ | 1.16 & 1.25   | 0.76 & 0.86  | 2.12             | 5.12             | 0.046                        | 0.392                          |
| $\text{K}_2\text{BaPO}_4\text{F}$  | 1.59          | 1.29         | 0.76             | 1.82             | 0.277                        | 0.079                          |

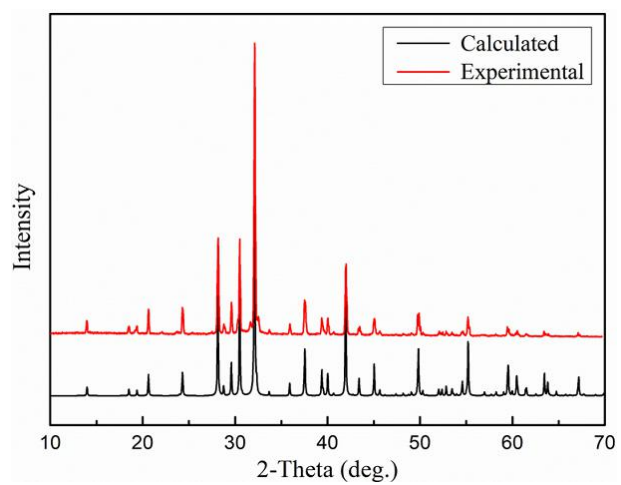

(a)

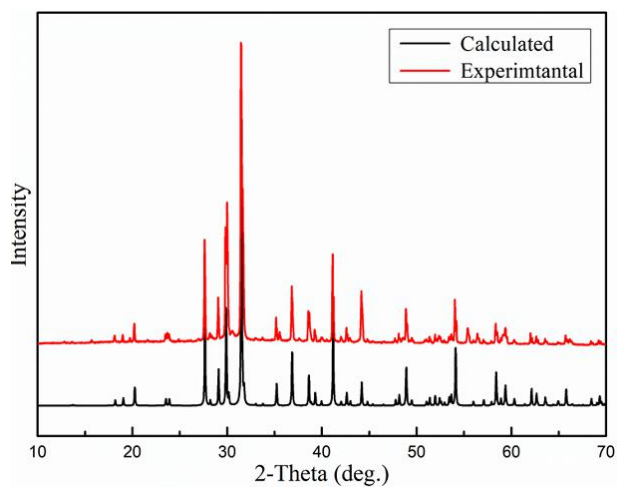

(b)

**Figure S1.** XRD patterns of: (a)  $K_2CaPO_4F$ ; (b)  $Rb_2CaPO_4F$ .

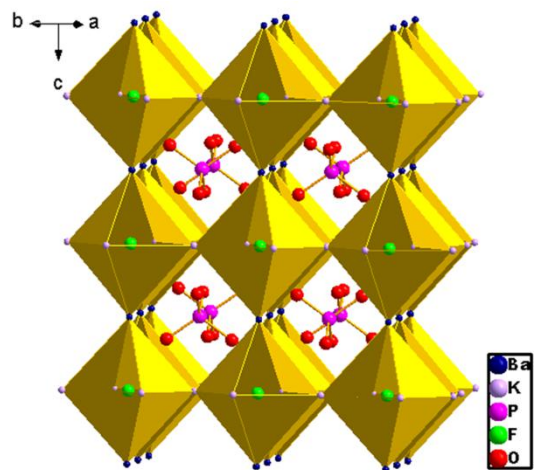

**Figure S2.** The 3D framework of  $K_2BaPO_4F$ .

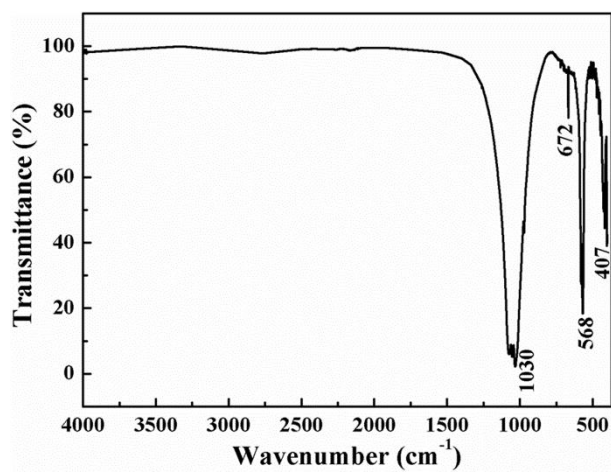

(a)

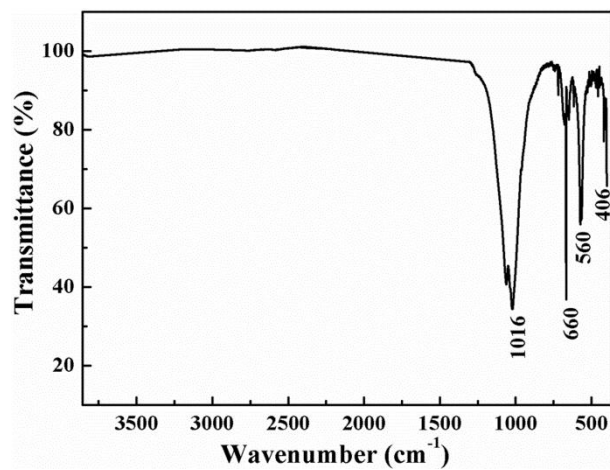

(b)

**Figure S3.** IR spectra of : (a)  $K_2CaPO_4F$ ; (b)  $Rb_2CaPO_4F$ .

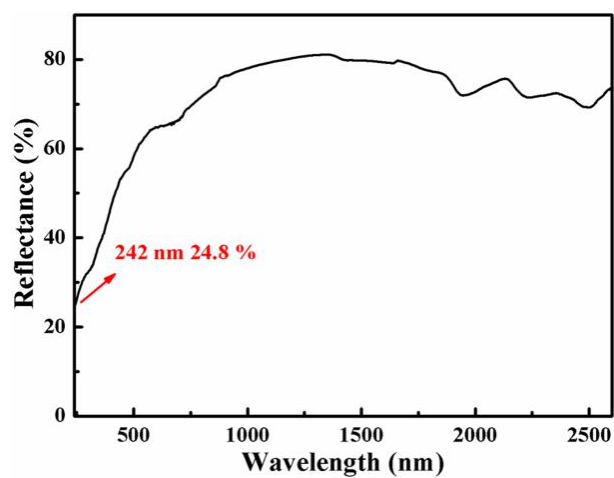

(a)

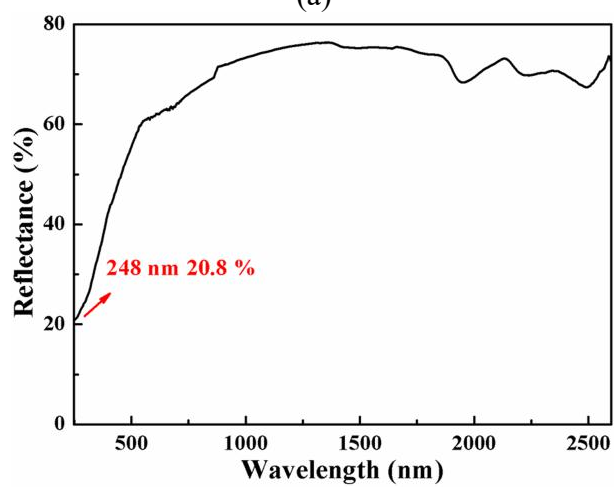

(b)

**Figure S4.** UV-Vis-NIR diffuse reflectance spectra of: (a)  $K_2CaPO_4F$ ; (b)  $Rb_2CaPO_4F$ .

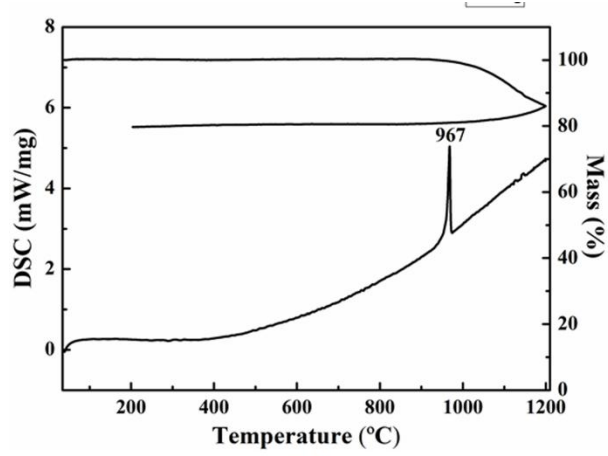

(a)

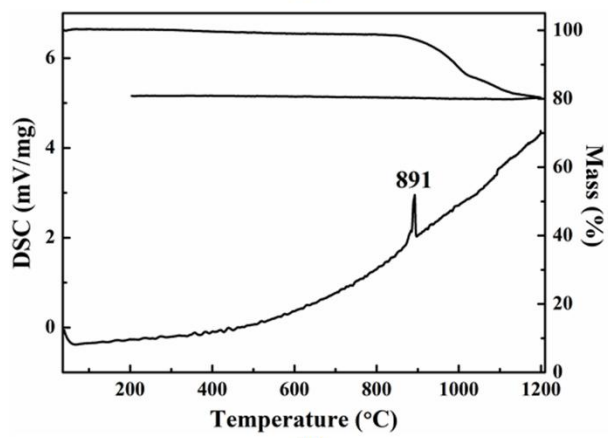

(b)

**Figure S5.** TG-DSC curves of: (a)  $K_2CaPO_4F$ ; (b)  $Rb_2CaPO_4F$ .

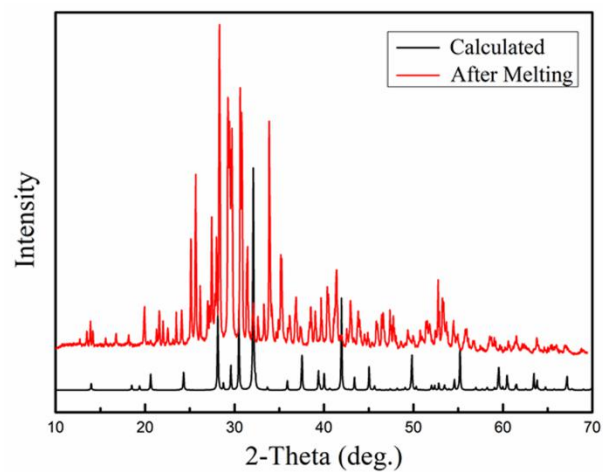

(a)

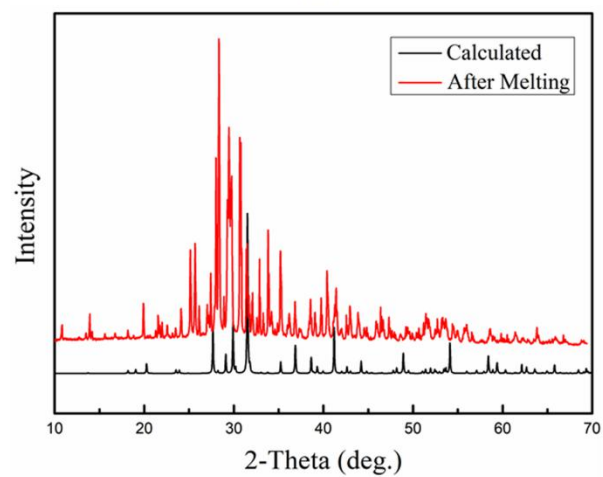

(b)

**Figure S6.** Calculated and after melting powder XRD patterns of: (a)  $\text{K}_2\text{CaPO}_4\text{F}$ ; (b)  $\text{Rb}_2\text{CaPO}_4\text{F}$ .
